# Supplementary material for: IL10 hypomethylation is associated with the risk of gastric cancer
Source: PubMed Central journal article supplement — Oncol Lett. 2021 Jan 31;21(4):241. doi: 10.3892/ol.2021.12502 (PMC7882872; doi:10.3892/ol.2021.12502), 2021-01-31
Supplement: Supplementary_Data.pdf [file Supplementary_Data.pdf]

Table SI. Association between *IL10* CGI hypomethylation and the clinicopathological characteristics of patients with GC.

| Variables                          | Number | Tumor PMR (%) <sup>a</sup> | r      | P-value            |
|------------------------------------|--------|----------------------------|--------|--------------------|
| Total cases                        | 117    | 29.16 (17.09-42.33)        | -      | -                  |
| Sex                                |        |                            | -0.01  | 0.917              |
| Male                               | 80     | 29.27 (17.88-39.03)        |        |                    |
| Female                             | 37     | 22.77±3.74                 |        |                    |
| Age, years                         |        |                            | -0.201 | 0.030 <sup>a</sup> |
| <65                                | 83     | 30.62 (17.89-42.67)        |        |                    |
| ≥65                                | 34     | 22.80 (15.55-37.35)        |        |                    |
| Surgical procedures                |        |                            | 0.007  | 0.936              |
| Radical gastrectomy                | 110    | 28.43 (17.09-42.33)        |        |                    |
| Conservative treatment             | 7      | 28.56±14.88                |        |                    |
| Differentiation                    |        |                            | -0.011 | 0.904              |
| Low and none                       | 99     | 28.23 (16.98-42.22)        |        |                    |
| High and medium                    | 18     | 20.26±4.77                 |        |                    |
| Lymph node metastasis <sup>b</sup> |        |                            | 0.039  | 0.679              |
| Negative                           | 16     | 22.35±5.59                 |        |                    |
| Positive                           | 100    | 28.62 (17.87-42.56)        |        |                    |
| TNM stage                          |        |                            | -0.043 | 0.642              |
| I+II                               | 22     | 22.08±4.71                 |        |                    |
| III+IV                             | 95     | 29.01 (16.34-39.95)        |        |                    |
| Borrmann type                      |        |                            | -0.038 | 0.681              |
| I+II                               | 7      | 16.09±6.08                 |        |                    |
| III+IV                             | 110    | 28.04 (17.09-40.52)        |        |                    |
| Disease recurrence                 |        |                            | 0.056  | 0.551              |
| No                                 | 95     | 27.84 (15.75-42.22)        |        |                    |
| Yes                                | 22     | 41.54±8.86                 |        |                    |

<sup>a</sup>Normal distributed data were described as mean ± standard deviation, and the non-normal distributed data were described as median with interquartile ranges. <sup>b</sup>Information for one patient was lost. PMR: the percentage of methylated reference.
